# Supplementary material for: Vascular remodeling by placenta-derived mesenchymal stem cells restores ovarian function in ovariectomized rat model via the VEGF pathway
Source: PubMed Central journal article supplement (PMC7892345; doi:10.1038/s41374-020-00513-1), 2020-12-10
Supplement: 41374_2020_513_MOESM1_ESM.pdf [file 41374_2020_513_MOESM1_ESM.pdf]

## Supplementary Figure 1

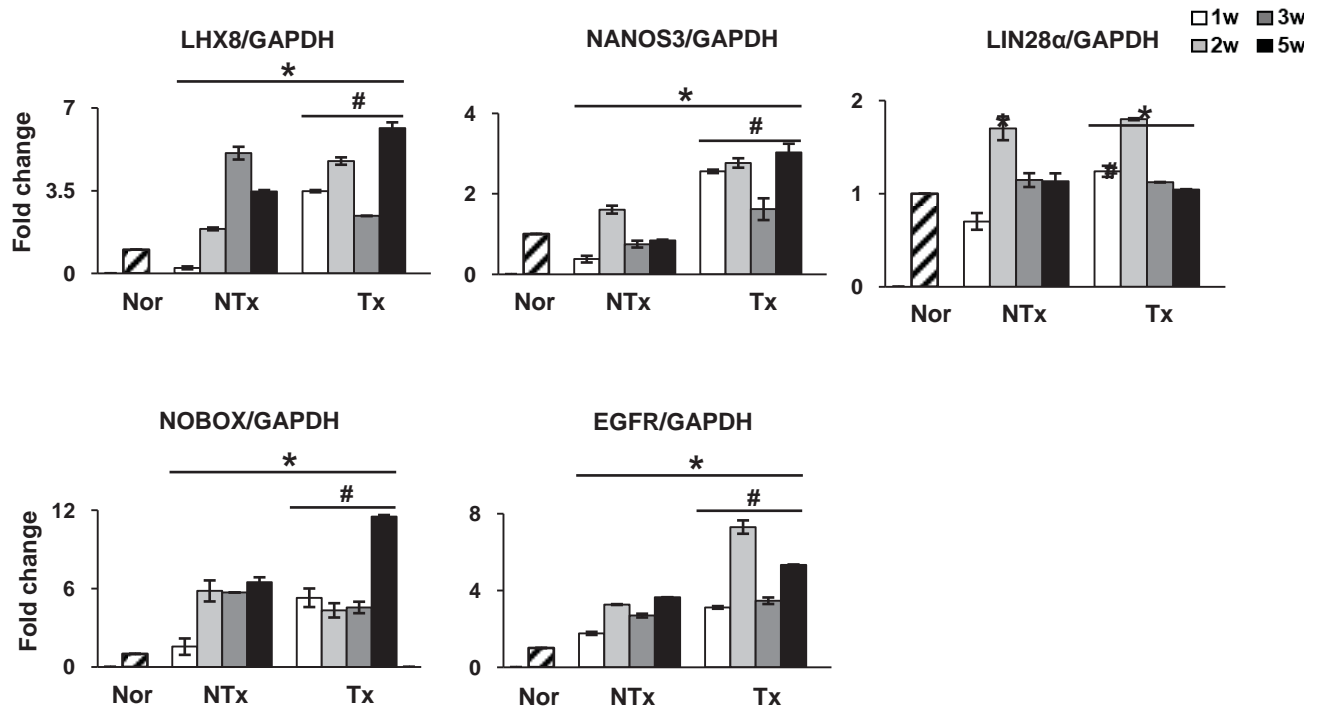

**Supplementary Fig. 1 Graph of the expression of folliculogenesis factors, as determined by western blot analysis.** Western blot analysis showed an overall increase in expression levels in the Tx group compared to the NTx group. \* vs. the normal group ( $P < 0.05$ ). # vs. the NTx group ( $P < 0.05$ ). Nor, normal group. NTx, non-transplantation group. Tx, transplantation group. 1w, week 1. 2w, week 2. 3w, week 3. 5w, week 5.

## Supplementary Figure 2

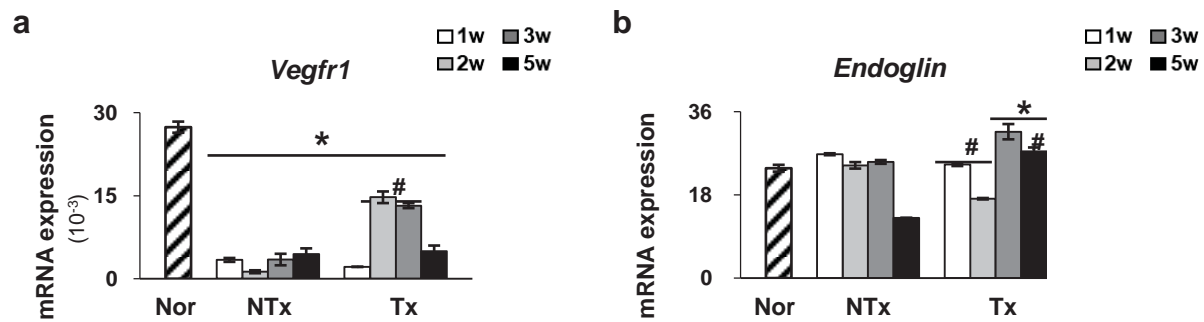

**Supplementary Fig. 2 mRNA expression levels of *Vegfr1* and *Endoglin*.** **a, b** The mRNA expression levels of *Vegfr1*, another member of the *Vegfr* family, and *Endoglin*, a proangiogenic factor, were increased in all groups. \* vs. the normal group ( $P < 0.05$ ). # vs. the NTx group ( $P < 0.05$ ). Nor, normal group. NTx, non-transplantation group. Tx, transplantation group. 1w, week 1. 2w, week 2. 3w, week 3. 5w, week 5.

## Supplementary Figure 3

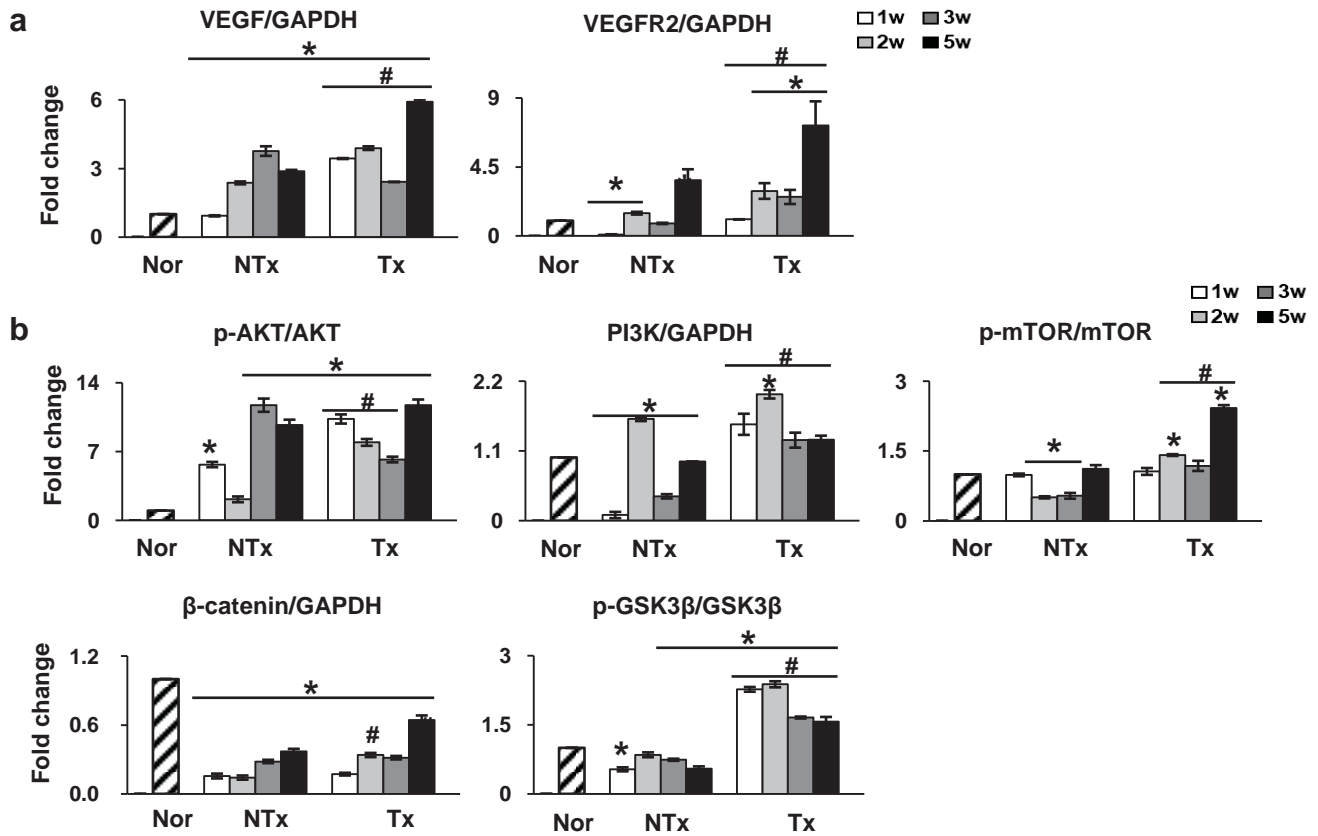

**Supplementary Fig. 3 Graph of the expression of VEGF signaling pathway-related proteins in vivo, as determined by western blot analysis . a, b** Western blot analysis showed an overall increase in expression levels in the Tx group compared to the NTx group. \* vs. the normal group ( $P < 0.05$ ). # vs. the NTx group ( $P < 0.05$ ). Nor, normal group. NTx, non-transplantation group. Tx, transplantation group. 1w, week 1. 2w, week 2. 3w, week 3. 5w, week 5.

## Supplementary Figure 4

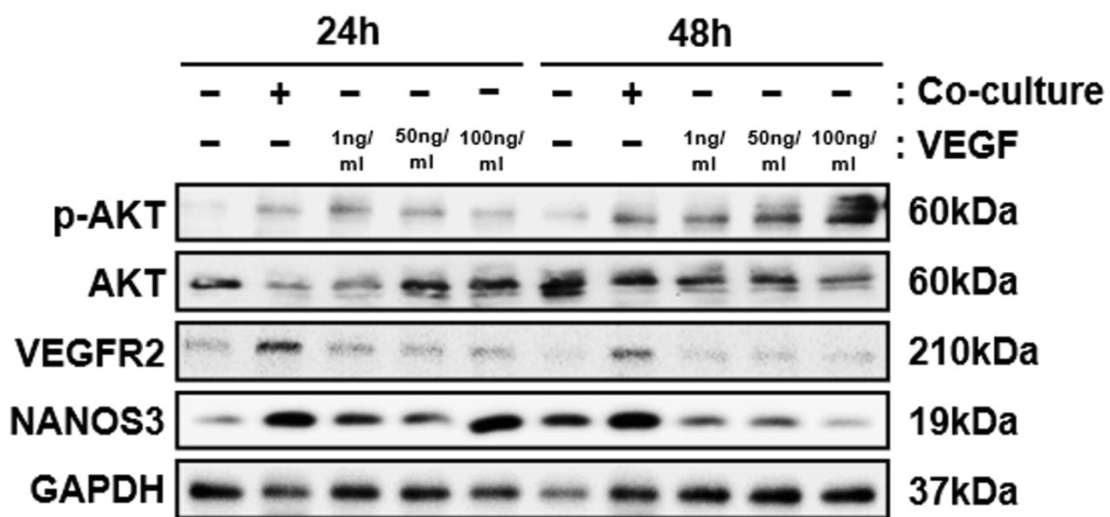

**Supplementary Fig. 4 Preliminary experimental result of target gene expressions after PD-MSC co-cultivation or VEGF treatment according to dose dependent.** Western blot analysis showed difference of target gene expression levels according to PD-MSC co-cultivation or dose dependent of VEGF recombinant.

## Supplementary Figure 5

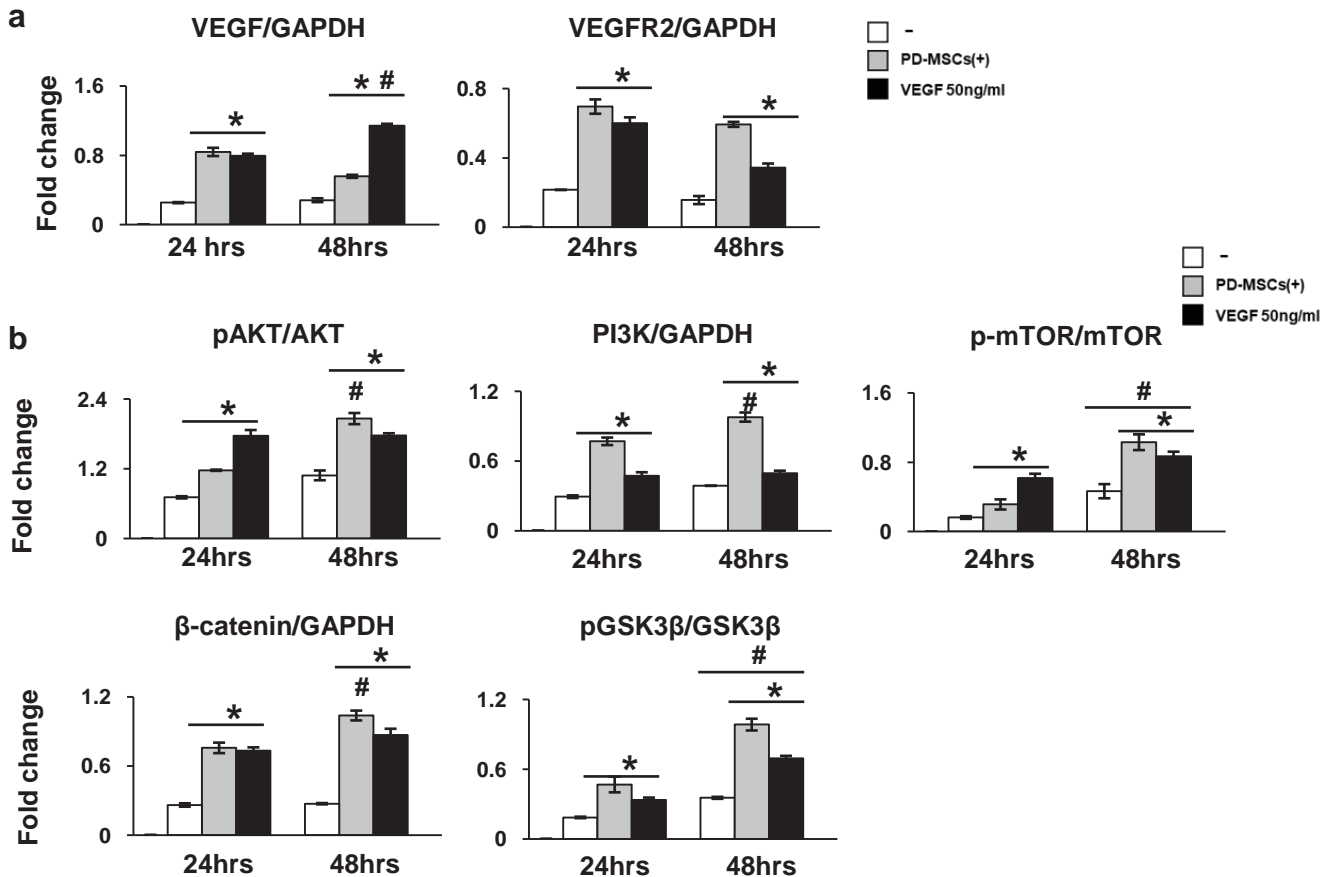

**Supplementary Fig. 4 Graph of the expression of VEGF signaling pathway-related proteins ex vivo, as determined by western blot analysis. a, b** Western blot analysis showed an overall increase in expression levels in the cocultivation group and/or VEGF-treated group compared to the NTx groups. The cocultivation group showed a higher increase than the VEGF-treated group in most cases. \* vs. non-transplantation group ( $P < 0.05$ ). # vs. 24-hour group ( $P < 0.05$ ).
